# Supplementary material for: Vector competence, vectorial capacity of Nyssorhynchus darlingi and the basic reproduction number of Plasmodium vivax in agricultural settlements in the Amazonian Region of Brazil
Source: Malar J. 2019 Apr 4;18:117. doi: 10.1186/s12936-019-2753-7 (PMC6449965; doi:10.1186/s12936-019-2753-7)
Supplement: Supplementary file 1 — Additional file 1. Distribution of malaria according to epidemiological week (EPI) in five municipalities of the Amazonian states, 2014–2018, Brazil. [file 12936_2019_2753_MOESM1_ESM.xlsx]

## Sheet: Plan1
Municipality of notification	State	EPI week/year
		01/2014	02/2014	03/2014	04/2014	05/2014	06/2014	07/2014	08/2014	09/2014	10/2014	11/2014	12/2014	13/2014	14/2014	15/2014	16/2014	17/2014	18/2014	19/2014	20/2014	21/2014	22/2014	23/2014	24/2014	25/2014	26/2014	27/2014	28/2014	29/2014	30/2014	31/2014	32/2014	33/2014	34/2014	35/2014	36/2014	37/2014	38/2014	39/2014	40/2014	41/2014	42/2014	43/2014	44/2014	45/2014	46/2014	47/2014	48/2014
Cruzeiro do Sul	Acre	235	507	532	463	375	372	333	361	323	256	283	266	310	336	348	300	372	294	424	454	509	378	379	327	271	334	338	316	292	314	306	271	294	376	352	313	349	323	269	269	290	322	287	276	318	360	312	357
Lábrea	Amazonas	25	70	105	109	90	89	87	84	83	83	89	121	167	133	113	94	139	123	113	154	200	157	152	121	119	212	288	268	322	403	340	286	185	190	236	208	168	192	121	124	140	85	82	85	118	96	82	70
Machadinho D'Oeste	Rondonia	5	3	10	5	12	1	11	11	10	2	8	1	3	4	4	4	4	4	5	5	1	4	1	4	3	5	0	5	8	11	6	18	19	16	5	10	17	15	8	4	9	9	8	10	9	9	14	15
Mâncio Lima	Acre	113	235	181	211	133	145	123	137	128	66	90	80	75	84	90	97	100	134	114	137	194	153	121	122	160	146	108	119	114	125	93	111	89	103	90	109	121	112	80	92	119	132	99	107	124	138	153	157
São Gabriel da Cachoeira	Amazonas	42	93	144	118	96	77	64	74	66	78	76	123	79	93	84	81	113	55	60	69	53	45	42	39	41	49	28	26	41	58	39	34	55	69	64	78	290	164	112	105	198	160	105	82	118	89	113	141
*Source: Sistema de Informação de Vigilância Epidemiológica - Sivep-Malária.
[truncated: 182 more columns]
